# Supplementary material for: The Incidence and Risk Factors for Enterotoxigenic E. coli Diarrheal Disease in Children under Three Years Old in Lusaka, Zambia
Source: MDPI journal article supplement (doi:10.3390/microorganisms12040698), 2024-03-29
Supplement: s1 [file s1]

## Primers

| Primers | Sequence                    | References |
|---------|-----------------------------|------------|
| LTF:    | ACG GCG TTA CTA TCC TCT C   | [13]       |
| LTR:    | TGG TCT CGG TCA GAT ATG TG  |            |
| SThnyF: | TTCACCTTTCCCTCAGGATG        |            |
| SThnyR: | CTATTCATGCTTTCAGGACCA       |            |
| STpF1   | TCT TTC CCC TCT TTT AGT CAG |            |
| STpR2   | ACA GGC AGG ATT ACA ACA AAG |            |

## PCR conditions

| <b>Multiplex PCR STh STp<br/>LT Mastermix</b> |       | 1 reaction |
|-----------------------------------------------|-------|------------|
|                                               |       | $\mu$ l    |
| <i>Template (DNA rapid boil<br/>bact)</i>     |       | 1          |
| <i>Primer LT F (10mM)</i>                     |       | 0.5        |
| <i>Primer LT R (10mM)</i>                     |       | 0.5        |
| <i>Primer STp F (10mM)</i>                    |       | 0.5        |
| <i>Primer STp R (10mM)</i>                    |       | 0.5        |
| <i>Primer STh F (10mM)</i>                    |       | 1          |
| <i>Primer STh R (10mM)</i>                    |       | 1          |
| <i>MgCl<sub>2</sub> (25mM)</i>                |       | 0.4        |
| <i>Readymix (x2)</i>                          |       | 10         |
|                                               |       |            |
| <i>Water</i>                                  |       | 4.6        |
| <i>Total volume</i>                           |       | <b>20</b>  |
|                                               |       |            |
| <i>Program</i>                                |       |            |
| 95°C                                          | 2 min |            |
| 95°C                                          | 15s   | 30 cycles  |
| 52°C                                          | 8s    |            |
| 72°C                                          | 10s   |            |
| 72°C                                          | 2 min |            |
